# Supplementary material for: Design of a Novel and Selective IRAK4 Inhibitor Using Topological Water Network Analysis and Molecular Modeling Approaches
Source: PubMed Central journal article supplement (PMC6321621; doi:10.3390/molecules23123136), 2018-11-29
Supplement: molecules-23-03136-s001.pdf [file molecules-23-03136-s001.pdf]

## Supporting Information

# Design of a Novel and Selective IRAK4 Inhibitor using Topological Water Network Analysis and Molecular Modeling Approaches

Myeong Hwi Lee <sup>1</sup>, Anand Balupuri <sup>1</sup>, Ye-rim Jung <sup>1</sup>, Sungwook Choi <sup>1</sup>, Areum Lee <sup>2</sup>, Young Sik Cho <sup>2</sup> and Nam Sook Kang <sup>1,\*</sup>

<sup>1</sup> Graduate School of New Drug Discovery and Development, Chungnam National University, 99 Daehak-ro, Yuseong-gu, Daejeon 34134, Korea

<sup>2</sup> College of Pharmacy, Keimyung University, 1095 Dalgubeol-daero, Dalseo-Gu, Daegu 42601, Korea

**Table S1.** Summary of the simulated protein kinase systems.

| Protein  | PDB Code | Resolution | Chain | Simulation box size         | Water molecules | Contours |    | Total atoms |
|----------|----------|------------|-------|-----------------------------|-----------------|----------|----|-------------|
|          |          |            |       |                             |                 | Na       | Cl |             |
| CDK2     | 4ERW     | 2.00       | A     | 8.70 nm × 8.70 nm × 8.70 nm | 20335           | 0        | 4  | 65857       |
| ASK1     | 4BF2     | 2.11       | A     | 8.24 nm × 8.24 nm × 8.24 nm | 17149           | 6        | 0  | 55705       |
| IRAK4    | 2NRY     | 2.15       | A     | 8.84 nm × 8.84 nm × 8.84 nm | 21406           | 13       | 0  | 68855       |
| GSK3β    | 1Q3D     | 2.20       | A     | 9.33 nm × 9.33 nm × 9.33 nm | 25164           | 0        | 7  | 81051       |
| DAPK1    | 1WVY     | 2.80       | A     | 8.52 nm × 8.52 nm × 8.52 nm | 19101           | 9        | 0  | 61750       |
| ITK      | 1SM2     | 2.30       | A     | 8.17 nm × 8.17 nm × 8.17 nm | 16755           | 12       | 0  | 54435       |
| PDPK1    | 1OKY     | 2.30       | A     | 9.08 nm × 9.08 nm × 9.08 nm | 23317           | 0        | 3  | 74688       |
| FES      | 3CBL     | 1.75       | A     | 8.17 nm × 8.17 nm × 8.17 nm | 16730           | 0        | 2  | 54497       |
| LCK      | 1QPD     | 2.00       | A     | 8.56 nm × 8.56 nm × 8.56 nm | 19432           | 7        | 0  | 62691       |
| ZAP-70   | 1U59     | 2.30       | A     | 8.72 nm × 8.72 nm × 8.72 nm | 20493           | 0        | 6  | 65999       |
| FYN      | 2DQ7     | 2.80       | X     | 8.63 nm × 8.63 nm × 8.63 nm | 19941           | 2        | 0  | 64073       |
| LIMK1    | 3S95     | 1.65       | A     | 9.34 nm × 9.34 nm × 9.34 nm | 25327           | 0        | 7  | 81046       |
| PRKACA   | 4C34     | 1.78       | A     | 8.50 nm × 8.50 nm × 8.50 nm | 18781           | 0        | 8  | 61438       |
| STK16    | 2BUJ     | 2.60       | A     | 9.87 nm × 9.87 nm × 9.87 nm | 30344           | 7        | 0  | 95752       |
| STK24    | 3CKX     | 2.70       | A     | 8.20 nm × 8.20 nm × 8.20 nm | 16784           | 5        | 0  | 54874       |
| PRKCQ    | 1XJD     | 2.00       | A     | 8.89 nm × 8.89 nm × 8.89 nm | 21733           | 9        | 0  | 69706       |
| LYN      | 3A4O     | 3.00       | X     | 8.33 nm × 8.33 nm × 8.33 nm | 17731           | 5        | 0  | 57507       |
| CHK1     | 1NVR     | 1.80       | A     | 9.20 nm × 9.20 nm × 9.20 nm | 24391           | 5        | 0  | 77571       |
| TAO2     | 2GCD     | 1.95       | A     | 8.21 nm × 8.21 nm × 8.21 nm | 16822           | 2        | 0  | 55428       |
| RPS6KB1  | 3A62     | 2.35       | A     | 8.67 nm × 8.67 nm × 8.67 nm | 20085           | 0        | 9  | 64916       |
| MAPKAPK2 | 1NXK     | 2.70       | A     | 9.34 nm × 9.34 nm × 9.34 nm | 25419           | 0        | 3  | 81108       |
| ALK      | 3LCS     | 1.95       | A     | 8.68 nm × 8.68 nm × 8.68 nm | 20070           | 4        | 0  | 64975       |
| CSK      | 1BYG     | 2.40       | A     | 8.42 nm × 8.42 nm × 8.42 nm | 18374           | 0        | 0  | 59274       |
| PIM1     | 1YHS     | 2.15       | A     | 8.19 nm × 8.19 nm × 8.19 nm | 16806           | 13       | 0  | 54789       |
| SRC      | 3D7T     | 2.90       | B     | 8.69 nm × 8.69 nm × 8.69 nm | 20332           | 6        | 0  | 65429       |
| SYK      | 1XBC     | 2.00       | A     | 8.72 nm × 8.72 nm × 8.72 nm | 20561           | 0        | 1  | 66125       |

**Table S2.** Percentage of water networks in various regions (A–E) for the simulated kinases.

| <b>Protein</b> | <b>PDB (%)</b> | <b>A (%)</b> | <b>B (%)</b> | <b>C (%)</b> | <b>D (%)</b> | <b>E (%)</b> |
|----------------|----------------|--------------|--------------|--------------|--------------|--------------|
| CDK2           | 4ERW           | 21.3         | 6.4          | 36.2         | 25.5         | 10.6         |
| ASK1           | 4BF2           | 18.5         | 0.0          | 29.6         | 33.3         | 18.5         |
| IRAK4          | 2NRY           | 25.0         | 7.1          | 17.9         | 35.7         | 14.3         |
| GSK3 $\beta$   | 1Q3D           | 22.7         | 2.3          | 52.3         | 13.6         | 9.1          |
| DAPK1          | 1WVY           | 28.9         | 13.2         | 31.6         | 7.9          | 18.4         |
| ITK            | 1SM2           | 36.0         | 6.0          | 16.0         | 26.0         | 16.0         |
| PDPK1          | 1OKY           | 19.6         | 15.2         | 26.1         | 15.2         | 23.9         |
| FES            | 3CBL           | 33.3         | 6.1          | 18.2         | 24.2         | 18.2         |
| LCK            | 1QPD           | 24.3         | 5.4          | 37.8         | 13.5         | 18.9         |
| ZAP-70         | 1U59           | 29.7         | 0.0          | 24.3         | 5.4          | 40.5         |
| FYN            | 2DQ7           | 21.4         | 12.5         | 35.7         | 16.1         | 14.3         |
| LIMK1          | 3S95           | 15.8         | 12.3         | 26.3         | 24.6         | 21.1         |
| PRKACA         | 4C34           | 25.9         | 11.1         | 29.6         | 18.5         | 14.8         |
| STK16          | 2BUJ           | 15.5         | 8.6          | 37.9         | 24.1         | 13.8         |
| STK24          | 3CKX           | 29.5         | 6.8          | 20.5         | 11.4         | 31.8         |
| PRKCQ          | 1XJD           | 1.7          | 15.5         | 31.0         | 20.7         | 31.0         |
| LYN            | 3A4O           | 6.3          | 3.1          | 9.4          | 31.3         | 50.0         |
| CHK1           | 1NVR           | 12.5         | 4.2          | 35.4         | 22.9         | 25.0         |
| TAO2           | 2GSD           | 23.5         | 5.9          | 17.6         | 11.8         | 41.2         |
| RPS6KB1        | 3A62           | 6.5          | 17.4         | 34.8         | 8.7          | 32.6         |
| MAPKAPK2       | 1NXK           | 30.0         | 6.7          | 33.3         | 16.7         | 13.3         |
| ALK            | 3LCS           | 30.9         | 12.7         | 16.4         | 16.4         | 23.6         |
| CSK            | 1BYG           | 25.0         | 17.3         | 23.1         | 15.4         | 19.2         |
| PIM1           | 1YHS           | 12.8         | 35.9         | 12.8         | 12.8         | 25.6         |
| SRC            | 3D7T           | 23.3         | 10.0         | 28.3         | 18.3         | 20.0         |
| SYK            | 1XBC           | 12.2         | 2.0          | 44.9         | 18.4         | 22.4         |

**Table S3. (A)** Sequence similarity of the D-site among the simulated kinases.

| Kinase       | CDK2 | ASK1 | IRAK4 | GSK3 $\beta$ | DAPK1 | ITK | PDPK1 | FES | LCK | ZAP-70 | FYN | LIMK1 | PRKACA |
|--------------|------|------|-------|--------------|-------|-----|-------|-----|-----|--------|-----|-------|--------|
| CDK2         | 100  | 20   | 40    | 40           | 40    | 40  | 40    | 60  | 60  | 0      | 60  | 40    | 40     |
| ASK1         | 20   | 100  | 80    | 60           | 60    | 40  | 20    | 60  | 60  | 40     | 60  | 80    | 80     |
| IRAK4        | 40   | 80   | 100   | 60           | 40    | 60  | 40    | 40  | 80  | 20     | 80  | 60    | 60     |
| GSK3 $\beta$ | 40   | 60   | 60    | 100          | 40    | 40  | 20    | 40  | 60  | 20     | 60  | 60    | 60     |
| DAPK1        | 40   | 60   | 40    | 40           | 100   | 40  | 60    | 60  | 40  | 60     | 40  | 60    | 80     |
| ITK          | 40   | 40   | 60    | 40           | 40    | 100 | 60    | 60  | 80  | 20     | 60  | 60    | 40     |
| PDPK1        | 40   | 20   | 40    | 20           | 60    | 60  | 100   | 40  | 60  | 40     | 40  | 40    | 40     |
| FES          | 60   | 60   | 40    | 40           | 60    | 60  | 40    | 100 | 60  | 40     | 60  | 80    | 60     |
| LCK          | 60   | 60   | 80    | 60           | 40    | 80  | 60    | 60  | 100 | 20     | 80  | 80    | 40     |
| ZAP-70       | 0    | 40   | 20    | 20           | 60    | 20  | 40    | 40  | 20  | 100    | 20  | 40    | 40     |
| FYN          | 60   | 60   | 80    | 60           | 40    | 60  | 40    | 60  | 80  | 20     | 100 | 80    | 40     |
| LIMK1        | 40   | 80   | 60    | 60           | 60    | 60  | 40    | 80  | 80  | 40     | 80  | 100   | 60     |
| PRKACA       | 40   | 80   | 60    | 60           | 80    | 40  | 40    | 60  | 40  | 40     | 40  | 60    | 100    |
| STK16        | 20   | 40   | 40    | 40           | 20    | 40  | 40    | 40  | 60  | 20     | 60  | 60    | 20     |
| STK24        | 20   | 80   | 60    | 40           | 60    | 40  | 20    | 60  | 60  | 60     | 60  | 80    | 60     |
| PRKCQ        | 60   | 60   | 60    | 20           | 60    | 60  | 40    | 80  | 60  | 40     | 60  | 60    | 60     |
| LYN          | 40   | 60   | 60    | 60           | 60    | 60  | 60    | 60  | 80  | 40     | 80  | 80    | 40     |
| CHK1         | 20   | 40   | 40    | 20           | 80    | 20  | 60    | 40  | 40  | 60     | 40  | 40    | 60     |
| TAO2         | 25   | 60   | 60    | 40           | 40    | 40  | 20    | 40  | 60  | 20     | 60  | 60    | 40     |
| RPS6KB1      | 40   | 60   | 60    | 40           | 100   | 40  | 60    | 60  | 60  | 60     | 60  | 60    | 80     |
| MAPKAPK2     | 40   | 60   | 60    | 40           | 80    | 40  | 60    | 80  | 60  | 40     | 60  | 60    | 80     |
| ALK          | 40   | 60   | 40    | 20           | 80    | 40  | 40    | 80  | 40  | 60     | 40  | 60    | 60     |
| CSK          | 40   | 60   | 60    | 60           | 60    | 60  | 60    | 60  | 80  | 40     | 80  | 80    | 40     |
| PIM1         | 50   | 17   | 33    | 50           | 33    | 33  | 33    | 50  | 50  | 17     | 33  | 33    | 33     |
| SRC          | 40   | 60   | 60    | 60           | 60    | 60  | 60    | 60  | 80  | 40     | 80  | 80    | 40     |
| SYK          | 20   | 40   | 40    | 40           | 40    | 40  | 60    | 40  | 40  | 60     | 40  | 40    | 40     |

**(B)** Sequence similarity of the D-site among the simulated kinases.

| Kinase       | STK16 | STK24 | PRKCQ | LYN | CHK1 | TAO2 | RPS6KB1 | MAPKAPK2 | ALK | CSK | PIM1 | SRC | SYK |
|--------------|-------|-------|-------|-----|------|------|---------|----------|-----|-----|------|-----|-----|
| CDK2         | 20    | 20    | 60    | 40  | 20   | 25   | 40      | 40       | 40  | 40  | 50   | 40  | 20  |
| ASK1         | 40    | 80    | 60    | 60  | 40   | 60   | 60      | 60       | 60  | 60  | 17   | 60  | 40  |
| IRAK4        | 40    | 60    | 60    | 60  | 40   | 60   | 60      | 60       | 40  | 60  | 33   | 60  | 40  |
| GSK3 $\beta$ | 40    | 40    | 20    | 60  | 20   | 40   | 40      | 40       | 20  | 60  | 50   | 60  | 40  |
| DAPK1        | 20    | 60    | 60    | 60  | 80   | 40   | 100     | 80       | 80  | 60  | 33   | 60  | 40  |
| ITK          | 40    | 40    | 60    | 60  | 20   | 40   | 40      | 40       | 40  | 60  | 33   | 60  | 40  |
| PDPK1        | 40    | 20    | 40    | 60  | 60   | 20   | 60      | 60       | 40  | 60  | 33   | 60  | 60  |
| FES          | 40    | 60    | 80    | 60  | 40   | 40   | 60      | 80       | 80  | 60  | 50   | 60  | 40  |
| LCK          | 60    | 60    | 60    | 80  | 40   | 60   | 60      | 60       | 40  | 80  | 50   | 80  | 40  |
| ZAP-70       | 20    | 60    | 40    | 40  | 60   | 20   | 60      | 40       | 60  | 40  | 17   | 40  | 60  |
| FYN          | 60    | 60    | 60    | 80  | 40   | 60   | 60      | 60       | 40  | 80  | 33   | 80  | 40  |
| LIMK1        | 60    | 80    | 60    | 80  | 40   | 60   | 60      | 60       | 60  | 80  | 33   | 80  | 40  |
| PRKACA       | 20    | 60    | 60    | 40  | 60   | 40   | 80      | 80       | 60  | 40  | 33   | 40  | 40  |
| STK16        | 100   | 40    | 20    | 60  | 20   | 40   | 20      | 20       | 20  | 60  | 17   | 60  | 40  |
| STK24        | 40    | 100   | 60    | 60  | 40   | 60   | 60      | 60       | 60  | 60  | 17   | 60  | 40  |
| PRKCQ        | 20    | 60    | 100   | 40  | 60   | 40   | 80      | 80       | 80  | 40  | 33   | 40  | 40  |
| LYN          | 60    | 60    | 40    | 100 | 40   | 60   | 60      | 40       | 60  | 100 | 30   | 100 | 60  |
| CHK1         | 20    | 40    | 60    | 40  | 100  | 40   | 80      | 60       | 60  | 40  | 17   | 40  | 40  |
| TAO2         | 40    | 60    | 40    | 60  | 40   | 100  | 40      | 40       | 40  | 60  | 17   | 60  | 40  |
| RPS6KB1      | 20    | 60    | 80    | 60  | 80   | 40   | 100     | 80       | 80  | 60  | 33   | 60  | 40  |
| MAPKAPK2     | 20    | 60    | 80    | 40  | 60   | 40   | 80      | 100      | 60  | 40  | 33   | 40  | 40  |
| ALK          | 20    | 60    | 80    | 60  | 60   | 40   | 80      | 60       | 100 | 60  | 33   | 60  | 40  |
| CSK          | 60    | 60    | 40    | 100 | 40   | 60   | 60      | 40       | 60  | 100 | 33   | 100 | 60  |
| PIM1         | 17    | 17    | 33    | 30  | 17   | 17   | 33      | 33       | 33  | 33  | 100  | 33  | 33  |
| SRC          | 60    | 60    | 40    | 100 | 40   | 60   | 60      | 40       | 60  | 100 | 33   | 100 | 60  |
| SYK          | 40    | 40    | 40    | 60  | 40   | 40   | 40      | 40       | 40  | 60  | 33   | 60  | 100 |

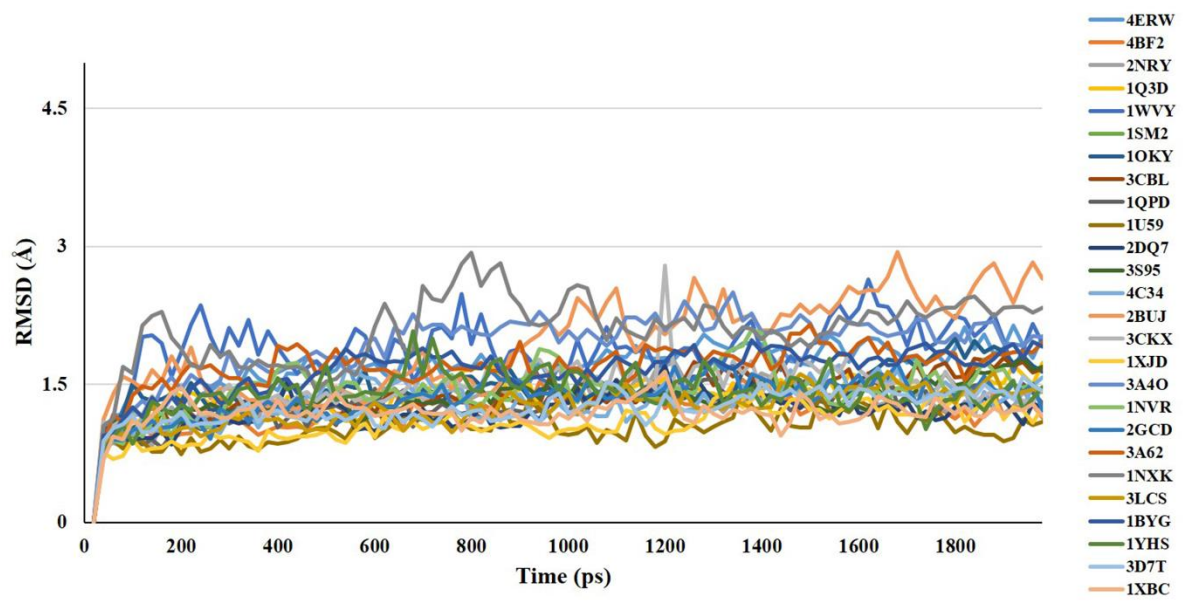

**Figure S1.** RMSD curves of the simulated kinases during 2000 ps MD simulation.

## Shape similarity codes

```
import java.io.*;
import java.util.*;

import javax.vecmath.Point3d;

/*
 * Shape Similarity
 * Input files:
 * Query Structure : .sd files
 * Target Structures : Saved .sd files in DB Generate Conformations
 *
 */

public class ShapeSim_Lig_Wat {

    static String QueryFileName = "STU";
    static String TargetFileName = "Wat";

    static int qatom;
    static int tatom;

    public static void main(String[] args) throws IOException {

        File dir = new File("E:\\\\cheminfo\\\\ShapeSim_Lig_Wat");

        if(!dir.exists() || !dir.isDirectory()) {
            System.out.println("Not a validated directory");
            System.exit(0);
        }

        File nf = new File("E:\\\\cheminfo\\\\ShapeSim_Lig_Wat\\\\results");
        if(!nf.exists()) {
            nf.mkdirs();
        }

        /*
        else {
            System.out.println("Remove Results Folder!");
            System.exit(0);
        }
        */

        String refName = QueryFileName;

        FileReader fr = new FileReader("E:\\\\cheminfo\\\\ShapeSim_Lig_Wat\\\\"+refName+".sd"); //
        // Ligand file

        Scanner sr = new Scanner(fr);

        while(sr.hasNextLine()) {
            String line = sr.nextLine();

            if(line.contains("V2000")) {
                StringTokenizer st = new StringTokenizer(line);
                qatom = Integer.parseInt(st.nextToken());
                System.out.println(refName+" atom # is "+qatom);
                break;
            }
        }

        fr.close();
    }
}
```

```

fr = new FileReader("E:\\cheminfo\\ShapeSim_Lig_Wat\\"+refName+".sd");

double[] qx = new double[qatom*3];
double[] qy = new double[qatom*3];
double[] qz = new double[qatom*3];

Scanner sr2 = new Scanner(fr);

while(sr2.hasNextLine()) {
    String line = sr2.nextLine();

    if(line.contains("V2000")) {
        for(int qi=0; qi<qatom; qi++) {
            line = sr2.nextLine();
            StringTokenizer qt = new StringTokenizer(line);
            qx[qi] = Double.parseDouble(qt.nextToken());
            qy[qi] = Double.parseDouble(qt.nextToken());
            qz[qi] = Double.parseDouble(qt.nextToken());
        }
        break;
    }
} // end while

FileReader fr2 = new FileReader("E:\\cheminfo\\ShapeSim_Lig_Wat\\"+TargetFileName+".sd"); // Wat

Scanner sr_cnt = new Scanner(fr2);

String line_cnt = "";
int wat_cnt = 0;
while(sr_cnt.hasNextLine()) {
    line_cnt = sr_cnt.nextLine();
    if(line_cnt.contains("V2000")) {
        wat_cnt++;
    }
}
tatom = wat_cnt;

sr_cnt.close();
fr2.close();

FileWriter fw = new FileWriter("E:\\cheminfo\\ShapeSim_Lig_Wat\\results\\"+refName+"_"+TargetFileName+".out"); // results file
fr2 = new FileReader("E:\\cheminfo\\ShapeSim_Lig_Wat\\"+TargetFileName+".sd"); // Wat
//
BufferedReader sr3 = new BufferedReader(fr2);
Scanner sr3 = new Scanner(fr2);

String line = "";

double[] tx = new double[tatom*3];
double[] ty = new double[tatom*3];
double[] tz = new double[tatom*3];

int ti = 0;

while(sr3.hasNextLine()) {
    line = sr3.nextLine();

```



```

        if(line.contains("V2000")) {

            line = sr3.nextLine();

            StringTokenizer st2 = new StringTokenizer(line);
            tx[ti] = Double.parseDouble(st2.nextToken());
            ty[ti] = Double.parseDouble(st2.nextToken());
            tz[ti] = Double.parseDouble(st2.nextToken());

            ti++;

        }

    }

    double[] moment1 = generateMoments(qatom, qx, qy, qz);
    double[] moment2 = generateMoments(tatom, tx, ty, tz);
    double sum = 0;
    for (int si=0; si<moment1.length; si++) {
        sum += Math.abs(moment1[si] - moment2[si]);
    }
    double sim = (1.0 / (1.0 + sum/12.0));

    fw.write(QueryFileName+"Wt"+sim+"\n");
    System.out.println(sim);

    sr3.close();
    fr2.close();
    fw.close();
} // end main

private static Point3d getGeometricCenter(int atomNum, double[] x, double[] y, double[] z) {

    double xi = 0;
    double yi = 0;
    double zi = 0;

    for(int i=0; i<x.length; i++) {
        xi += x[i];
        yi += y[i];
        zi += z[i];
    }
    xi /= atomNum;
    yi /= atomNum;
    zi /= atomNum;

    return new Point3d(xi,yi,zi);
}

private static float mu1(double[] x) {
    float sum = 0;
    for (double aX : x) {
        sum += aX;
    }
    return sum / x.length;
}

```

```

private static float mu2(double[] x, double mean) {
    float sum = 0;
    for (double aX : x) {
        sum += (aX - mean) * (aX - mean);
    }
    return sum / (x.length - 1);
}

private static float mu3(double[] x, double mean, double sigma) {
    float sum = 0;
    for (double aX : x) {
        sum += ((aX - mean) / sigma) * ((aX - mean) / sigma) * ((aX - mean) / sigma);
    }
    return sum / x.length;
}

public static double[] generateMoments(int atomNum, double[] x, double[] y, double[] z) {

//    System.out.println(atomNum);

    Point3d ctd = getGeometricCenter(atomNum, x, y, z);
    Point3d cst = new Point3d();
    Point3d fct = new Point3d();
    Point3d ftf = new Point3d();

    double[] distCtd = new double[atomNum];
    double[] distCst = new double[atomNum];
    double[] distFct = new double[atomNum];
    double[] distFtf = new double[atomNum];

    int counter = 0;
    double min = Double.MAX_VALUE;
    double max = Double.MIN_VALUE;

    //dist to ctd
    for(int i=0; i<atomNum; i++) {
        Point3d p = new Point3d(x[i], y[i], z[i]);
        double d = p.distance(ctd);
        distCtd[counter++] = d;

        if(d < min) {
            cst.x = p.x;
            cst.y = p.y;
            cst.z = p.z;
            min = d;
        }
        if(d > max) {
            fct.x = p.x;
            fct.y = p.y;
            fct.z = p.z;
            max = d;
        }
    }

    //dist to cst
    counter = 0;
    for(int i=0; i<atomNum; i++) {
        Point3d p = new Point3d(x[i], y[i], z[i]);

```

```

        double d = p.distance(cst);
        distCst[counter++] = d;
    }

    //dist to fct
    counter = 0;
    max = Double.MIN_VALUE;
    for(int i=0; i<AtomNum; i++) {
        Point3d p = new Point3d(x[i], y[i], z[i]);
        double d = p.distance(fct);
        distFct[counter++] = d;

        if (d > max) {
            ffx = p.x;
            ffy = p.y;
            fffz = p.z;
            max = d;
        }
    }

    //dist to ftf
    counter = 0;
    for(int i=0; i<AtomNum; i++) {
        Point3d p = new Point3d(x[i], y[i], z[i]);
        double d = p.distance(fft);
        distFtf[counter++] = d;
    }

    double[] moments = new double[12];

    double mean = mu1(distCtd);
    double sigma2 = mu2(distCtd, mean);
    double skewness = mu3(distCtd, mean, Math.sqrt(sigma2));
    moments[0] = mean;
    moments[1] = sigma2;
    moments[2] = skewness;

    mean = mu1(distCst);
    sigma2 = mu2(distCst, mean);
    skewness = mu3(distCst, mean, Math.sqrt(sigma2));
    moments[3] = mean;
    moments[4] = sigma2;
    moments[5] = skewness;

    mean = mu1(distFct);
    sigma2 = mu2(distFct, mean);
    skewness = mu3(distFct, mean, Math.sqrt(sigma2));
    moments[6] = mean;
    moments[7] = sigma2;
    moments[8] = skewness;

    mean = mu1(distFtf);
    sigma2 = mu2(distFtf, mean);
    skewness = mu3(distFtf, mean, Math.sqrt(sigma2));
    moments[9] = mean;
    moments[10] = sigma2;
    moments[11] = skewness;

    return moments;
}
}

```
